# Supplementary material for: Quantitative and systematic designing of fluorophores enables ultrasensitive distinguishing carbonyls
Source: Royal Society of Chemistry journal article supplement (doi:10.1039/d1nj01777b), 2021-01-01
Supplement: d1nj01777b1.pdf [file d1nj01777b1.pdf]

supplementary information for *New Journal of Chemistry*

## Quantitative and Systematical Designing Fluorophores Enables Ultrasensitive Distinguishing Carbonyls

Lei Shi,<sup>a</sup> Chenxu Yan,<sup>b</sup> Yunyu Li,<sup>a</sup> Lixiang Yang,<sup>c</sup> Wenle Mao,<sup>b</sup> Wei Xia,<sup>a</sup>

Lingfan Zhang,<sup>a\*</sup> Yu Chen<sup>b</sup> and Wenqing Zhang<sup>a\*\*</sup>

<sup>a</sup> School of Chemistry and Molecular Engineering, East China University of Science and Technology, 130 Meilong Road, Shanghai 200237, P. R. China.

<sup>b</sup> Key Laboratory for Advanced Materials, Feringa Nobel Prize Scientist Joint Research Centre, Institute of Applied Chemistry, East China University of Science and Technology, No.130 Meilong Road, Shanghai 200237, P. R. China.

<sup>c</sup> Shenzhen Bay Laboratory, BayRay Innovation Centre, No.9 Duxue Road, Shenzhen, 518000, P. R. China

### **Data Availability.**

The authors declare that the main data supporting the findings of this study are available within the article and its Supplementary Information files. Extra data are available from the corresponding author upon request.

## Table of Contents

|                                                                                                |     |
|------------------------------------------------------------------------------------------------|-----|
| Absorption and fluorescence measurement .....                                                  | S3  |
| Preparation of UHPLC-FLD work solution.....                                                    | S4  |
| Synthetic route of <b>NH-4</b> .....                                                           | S5  |
| The kinetic fitting curves.....                                                                | S5  |
| The plots of rate constants $k_{\text{obs}}$ vs negative charge population .....               | S5  |
| The $^1\text{H}$ NMR spectra of <b>NH-1~7</b> .....                                            | S6  |
| The $^{13}\text{C}$ NMR spectra of <b>NH-2~7</b> .....                                         | S7  |
| Tables.....                                                                                    | S8  |
| LUMO energies of <b>NH-1~7</b> .....                                                           | S8  |
| HOMO energies of <b>NH-1~7</b> .....                                                           | S8  |
| The C...C distances of naphthalimide cyclic .....                                              | S9  |
| The rate constants $k_{\text{obs}}$ of <b>NH-1~6</b> .....                                     | S9  |
| The delta Gibbs free energy $\Delta G$ ( $\text{kcal}\cdot\text{mol}^{-1}$ ) of reaction ..... | S10 |

### Characterization of fluorescent reagent

High-resolution mass spectra (HRMS) were obtained on LCT Premier XE spectrometer, ESI-TOF (Waters, United States). The  $^1\text{H}$  and  $^{13}\text{C}$  NMR spectra were recorded on an AM 400 spectrometer, using TMS as an internal standard (Bruker United States) (Supplementary figure Fig. S4). Yield of **NH-4**: 85%; orange solid; mp 141–144 °C; FTIR (neat,  $\nu/\text{cm}^{-1}$ ): 3438 (active hydrogen, N—H), 3321 (naphthalimide ring, C—H), 2971(tertiary carbon, C—H), 1682 (C=O), 1642, 1576, 1539 (C=C, naphthalimide ring), 1357, 1395 (C=C, naphthalimide ring), 1246 (C—N), 774 (in naphthalimide plane, C=C), 750 ( $\delta$ , N—H);  $^1\text{H}$ NMR (100 MHz,  $\text{CDCl}_3$ )  $\delta$ : 1.58 (6H, s,  $2\times\text{CH}_3$ ), 3.84 (4H, s,  $\text{NH}_2$ ), 5.41–5.48 (H, t,  $J = 7.0$  Hz, CH), 6.56 (H, s, 2H, NH), 7.22–7.24 (H, d,  $J = 6.6$  Hz, CH-5'), 7.62–7.65 (H, t,  $J = 6.6$  Hz, CH-6'), 8.00–8.03 (H, d,  $J = 6.6$  Hz, CH-3'), 8.51–8.53 (H, d,  $J = 6.6$  Hz, CH-2'), 8.56–8.52 (H, d,  $J = 6.6$  Hz, CH-8'). ESI-MS = 268 (M - H); HRMS *Calculated. for*  $\text{C}_{15}\text{H}_{14}\text{N}_3\text{O}_2$ : 268.1086. Found: 268.1075.

### Absorption and fluorescence measurement

The samples for absorption spectra were prepared by successively placing acetonitrile (ACN, 850  $\mu\text{L}$ ),  $\text{H}_2\text{O}$  (950  $\mu\text{L}$ ) and one of **NH-1~7** (200  $\mu\text{L}$ , 0.5 mM) in 3 mL cuvettes and were tested in a Varian Cary 500 UV/VIS spectrophotometer (Agilent, United States). Fluorescent measurements of the **NH-1~7-formaldehyde** were similar by placing acetonitrile (ACN, 750  $\mu\text{L}$ ),  $\text{H}_2\text{O}$  (950  $\mu\text{L}$ ), one of **NH-1~7** (200  $\mu\text{L}$ , 0.5 mM) and formaldehyde stock solution (1.0 mM, 100  $\mu\text{L}$ ) to obtain the final concentration of formaldehyde and fluorescent reagents both 0.05 mM in the 3

mL cuvettes. The slit width was set at 2.5 nm for excitation of 430 nm with photon multiplier voltage at 580 V on a Varian Cary Eclipse fluorescence spectrophotometer (Agilent, United States). The relative fluorescence quantum yield ( $\Phi_f$ ) was obtained by integrating the emission spectra of **NH-1~7-formaldehyde** to compare with Rhodamine 6G (Sigma-Aldrich, United States) and each sample was triply tested. The photography for fluorescent emission of sample vials (showed in Fig. 3a) were captured by a Canon EOS 70d digital SLR camera (Canon, Japan) with f/5.6, s-1.6 s, iso-100 at 5800 K (Shade) and f/5.6, s-1/20 s, iso-100 at 5800 K (Tint).

#### **Preparation of UHPLC-FLD work solution**

10 kinds of carbonyl species were involved in the UHPLC-FLD method development and validation., i.e. formaldehyde aqueous solution (37%) and acetaldehyde aqueous solution (40%) (Shanghai Chemicals, China), propylaldehyde (>95.0%), butyraldehyde (>98.0%), valeraldehyde (>98.0%), hexaldehyde (>98.0%), acetone (>99.5%), 2-Butanone (>99.0%), benzaldehyde (>98.0%) and m-methylbenzaldehyde (>97.0%) (Sigma-Aldrich, United States). The carbonyl solutions (0.01 mM - 0.001 nM) were diluted with initial mobile phase (ACN: water = 65:35, v/v) from standard stock solution (0.1 M). The fluorescent derivatization processes between carbonyls and **NH-4** were carried out at 25 °C for 15 min in 1.5 mL vials before testing. Briefly, 800  $\mu$ L initial mobile phase was added to a vial, 100  $\mu$ L of **NH-4** stock solution (0.5 mM) and 100  $\mu$ L dilution solution of carbonyl was added in succession, 15 min later at 25 °C the vial was placed into UHPLC system for analysis.

## Figures

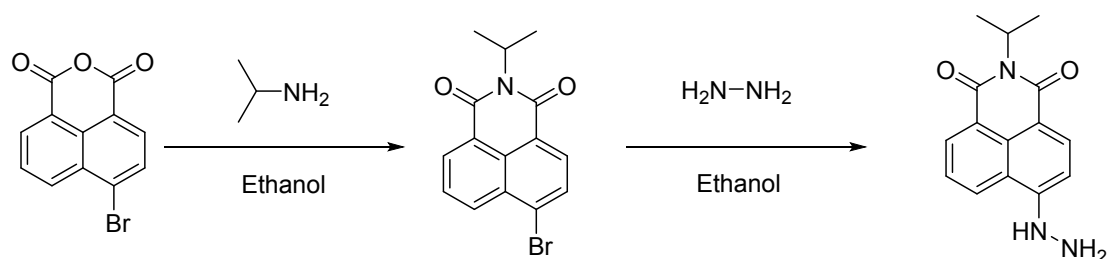

**Fig. S1** Synthetic route of NH-4.

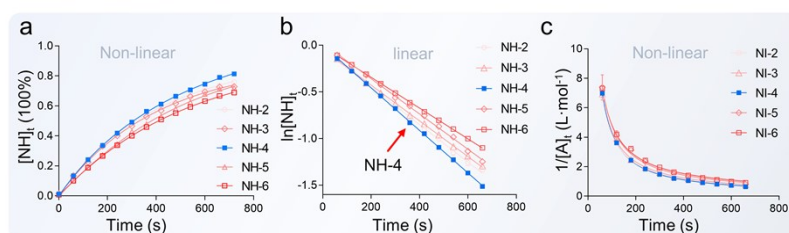

**Fig. S2** The kinetic fitting curves of NH-2~6 and formaldehyde, zero(a), first(b) and second(c) order. Note: the first order fitting curves were showing the best linearity.

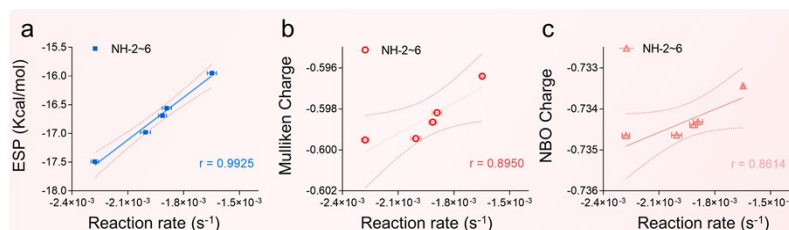

**Fig. S3** The plots of rate constants  $k_{\text{obs}}$  and the negative charge population with different theoretical calculation methods Electro-Static Potential (a), Mulliken charge (b) and Natural bonding orbital (c).

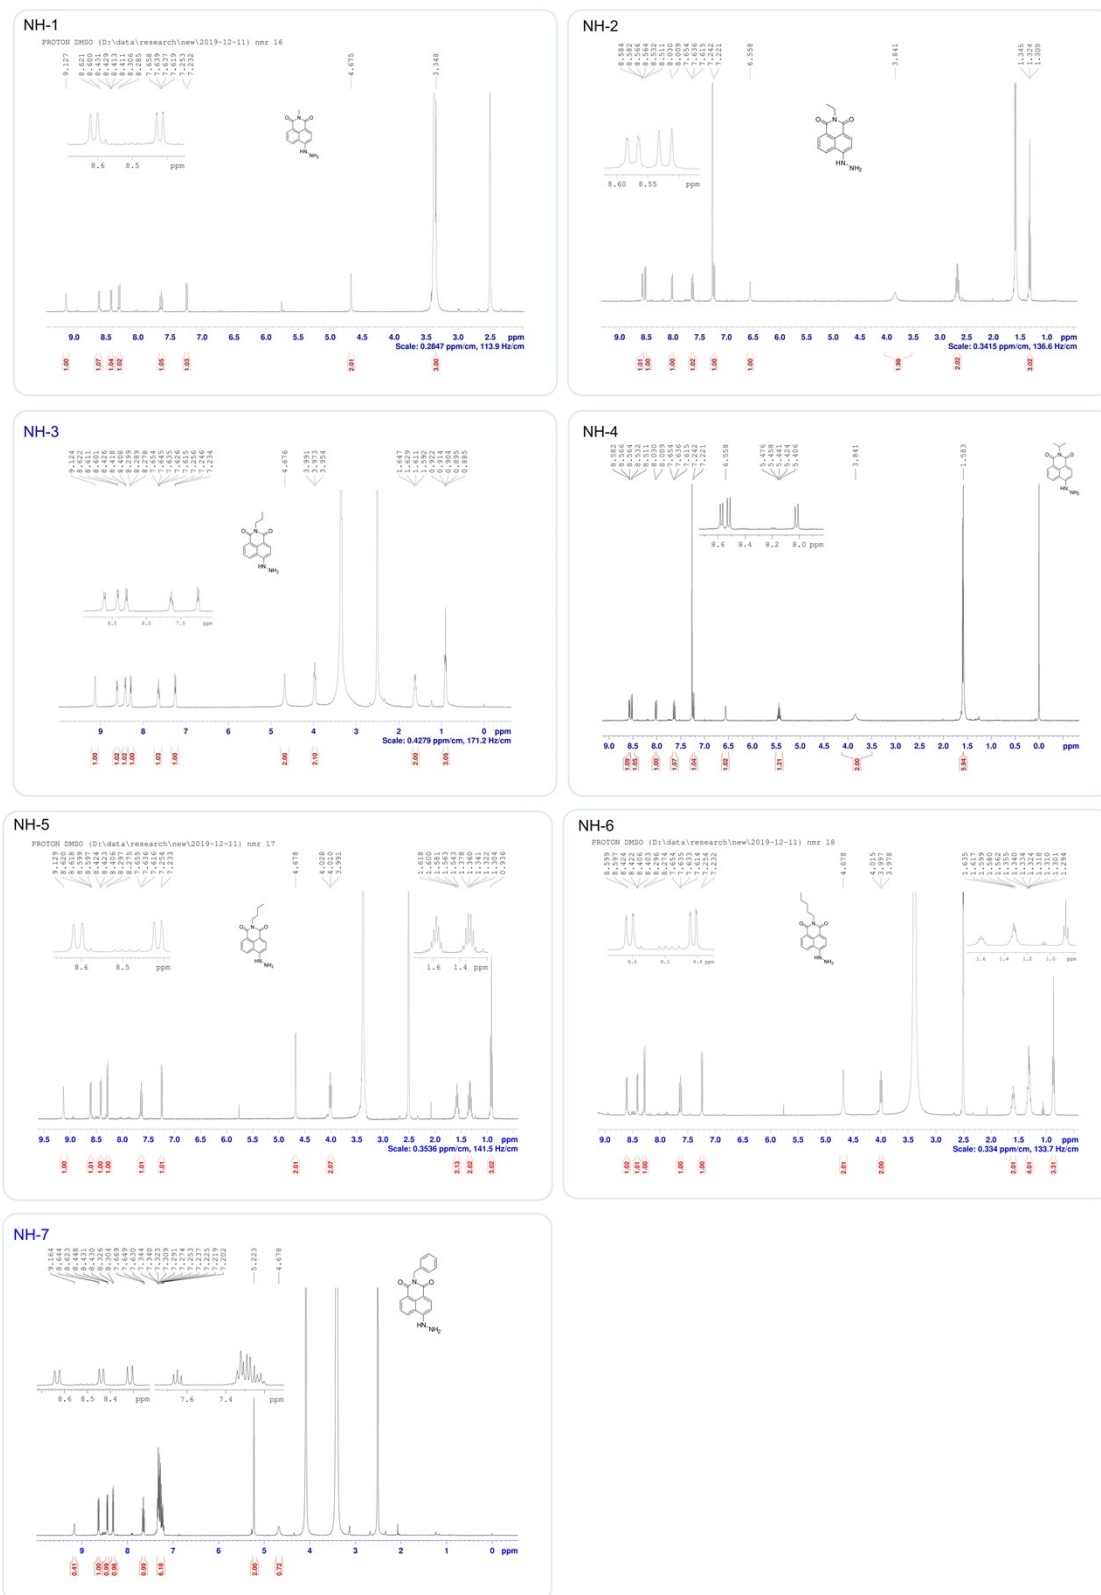

**Fig. S4** The  $^1\text{H}$  NMR spectra of NH-1~7 (tetramethylsilane, TMS as the internal standard, DMSO- $d_6$ ).

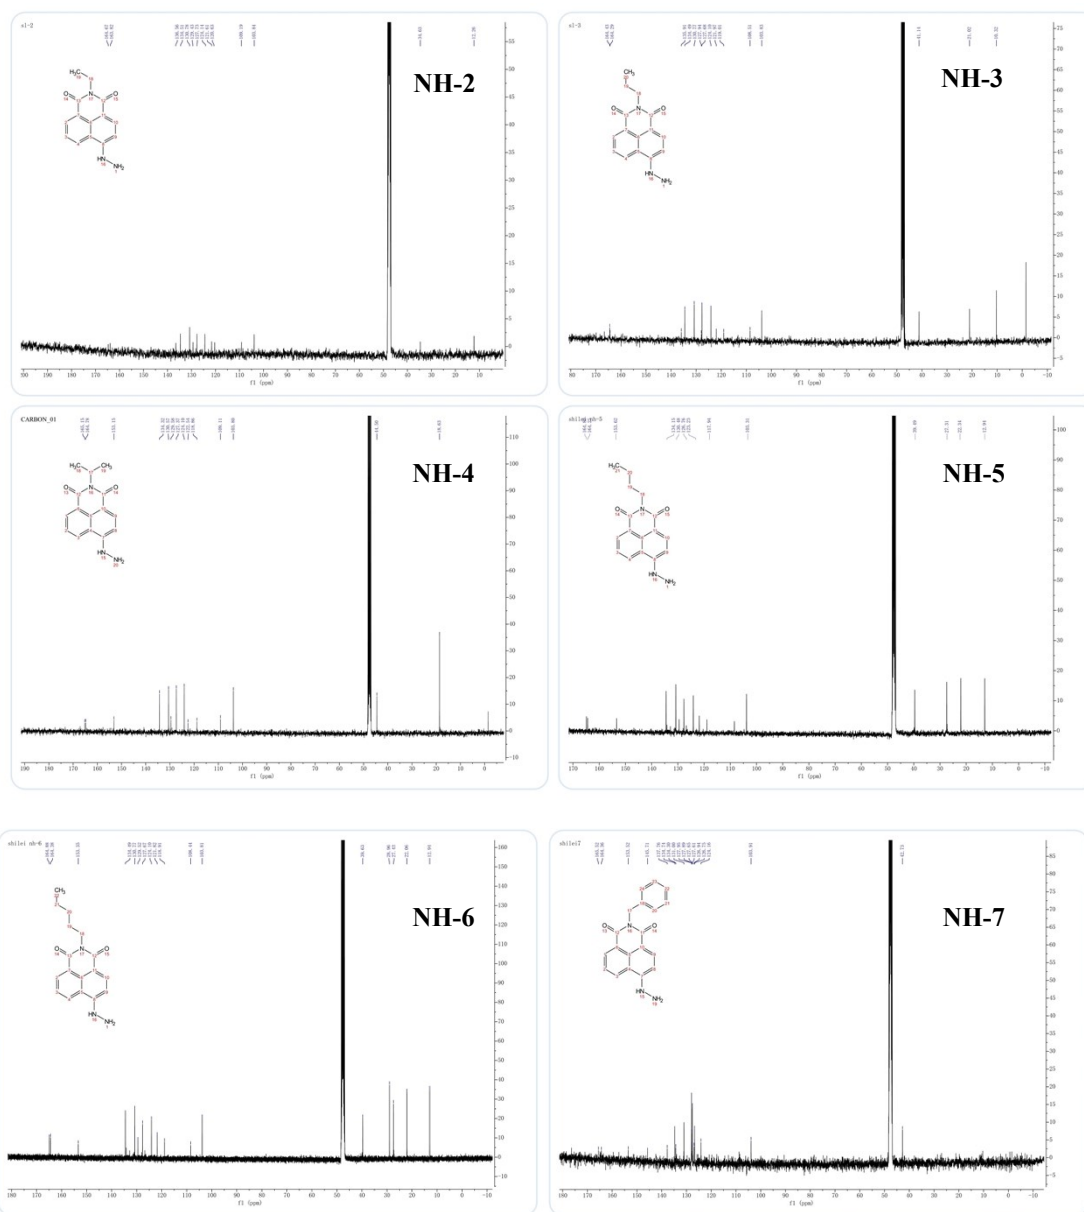

**Fig. S5** The  $^{13}\text{C}$  NMR spectra of NH-2~7 (number of Scans 10000, tetramethylsilane, TMS as the internal standard, Methanol- $d_4$ ).

## Tables

**Table S1** LUMO energies of **NH-1~7** with DFT, B3-LYP/6-311G\*

| LUMO Energy                | NH-1     | NH-2    | NH-3       | NH-4       | NH-5    | NH-6     | NH-7     |
|----------------------------|----------|---------|------------|------------|---------|----------|----------|
| (eV)                       | (Methyl) | (Ethyl) | (n-Propyl) | (i-Propyl) | (Butyl) | (Pentyl) | (Benzyl) |
| Rea. Fluor. <sup>a</sup>   | -2.454   | -2.447  | -2.446     | -2.440     | -2.445  | -2.448   | -2.487   |
| Rea. Hydraz.               | 2.612    | 2.608   | 2.607      | 2.608      | 2.610   | 2.615    | 2.614    |
| Prod. Fluor.               | -2.438   | -2.433  | -2.432     | -2.426     | -2.429  | -2.429   | -2.469   |
| Prod. Hydraz. <sup>b</sup> | -0.223   | -0.223  | -0.224     | -0.223     | -0.224  | -0.226   | -0.224   |

<sup>a, b</sup> “Rea.” and “Prod.” are representing the derivative reagents NH-1~7 and derivative products NH-1-formaldehyde ~ NH-7-formaldehyde. “Fluor.” and “Hydraz.” are representing the fluorescent naphthalimide moiety and hydrazine/ hydrazone moiety.

**Table S2** HOMO energies of **NH-1~7** with DFT, B3-LYP/6-311G\*

| HOMO Energy             | NH-1     | NH-2    | NH-3       | NH-4       | NH-5    | NH-6     | NH-7     |
|-------------------------|----------|---------|------------|------------|---------|----------|----------|
| (eV)                    | (Methyl) | (Ethyl) | (n-Propyl) | (i-Propyl) | (Butyl) | (Pentyl) | (Benzyl) |
| Rea. Fluor.             | -6.373   | -6.368  | -6.365     | -6.355     | -6.363  | -6.362   | -6.387   |
| Rea. Hydraz.            | -6.164   | -6.181  | -6.183     | -6.178     | -6.176  | -6.148   | -6.151   |
| Prod. Fluor.            | -6.376   | -6.37   | -6.367     | -6.357     | -6.365  | -6.371   | -6.375   |
| Prod. Hydraz.           | -7.014   | -7.016  | -7.013     | -7.017     | -7.014  | -7.013   | -7.013   |
| $\Delta E$ <sup>c</sup> | 0.638    | 0.647   | 0.645      | 0.660      | 0.649   | 0.642    | 0.638    |
| $\Phi_f$                | 65.97    | 78.31   | 77.25      | 88.04      | 76.13   | 72.00    | 67.27    |

<sup>c</sup>  $\Delta E$  is the energy gap of products (NH-x-formaldehyde) between fluorescent naphthalimide moiety and hydrazone moiety.



**Table S3** The C...C distances of naphthalimide cyclic <sup>d</sup>

| Number  | NH-1<br>(Methyl) | NH-2<br>(Ethyl) | NH-3<br>(n-Propyl) | NH-4<br>(i-Propyl) | NH-5<br>(Butyl) | NH-6<br>(Pentyl) | NH-7<br>(Benzyl) |
|---------|------------------|-----------------|--------------------|--------------------|-----------------|------------------|------------------|
| 1       | 3.8822           | 3.8815          | 3.8883             | 3.9133             | 3.8990          | 3.9077           | 3.8862           |
| 2       | 3.8806           | 3.8923          | 3.9032             | 3.9424             | 3.9151          | 3.9204           | 3.8845           |
| 3       | 3.7912           | 3.8053          | 3.8152             | 3.8667             | 3.8174          | 3.8157           | 3.7998           |
| 4       | 3.7577           | 3.7602          | 3.7636             | 3.7981             | 3.7612          | 3.7666           | 3.7524           |
| 4a      | 3.8522           | 3.8522          | 3.8576             | 3.8740             | 3.8669          | 3.8755           | 3.8583           |
| 5       | 3.9038           | 3.9104          | 3.9139             | 3.9706             | 3.9199          | 3.9491           | 3.9225           |
| 6       | 3.9121           | 3.9234          | 3.9388             | 3.9929             | 3.9481          | 3.9751           | 3.9612           |
| 7       | 3.8183           | 3.8172          | 3.8364             | 3.8629             | 3.8393          | 3.8502           | 3.8834           |
| 8       | 3.7596           | 3.7600          | 3.7622             | 3.7687             | 3.7519          | 3.7661           | 3.8044           |
| 8a      | 3.8518           | 3.8594          | 3.8491             | 3.8592             | 3.8540          | 3.8515           | 3.8624           |
| Average | 3.8410           | 3.8462          | 3.8528             | 3.8849             | 3.8573          | 3.8678           | 3.8615           |

<sup>d</sup> DFT calculation at B3-LYP/6-31++G\*\* level.**Table S4** The rate constants  $k_{\text{obs}}$  of NH-1~6 under pseudo-first order equation <sup>e</sup>

| kinetic data<br>(s <sup>-1</sup> ) | NH-2<br>(Ethyl)        | NH-3<br>(n-Propyl)     | NH-4<br>(i-Propyl)     | NH-5<br>(Butyl)        | NH-6<br>(Pentyl)       |
|------------------------------------|------------------------|------------------------|------------------------|------------------------|------------------------|
| $k_{\text{obs}}$ , (283 K)         | $1.070 \times 10^{-3}$ | $0.985 \times 10^{-3}$ | $1.164 \times 10^{-3}$ | $0.970 \times 10^{-3}$ | $0.812 \times 10^{-3}$ |
| R <sup>2</sup>                     | 0.9989                 | 0.9996                 | 0.9971                 | 0.9996                 | 0.9965                 |
| $k_{\text{obs}}$ , (296 K)         | $2.005 \times 10^{-3}$ | $1.914 \times 10^{-3}$ | $2.278 \times 10^{-3}$ | $1.891 \times 10^{-3}$ | $1.648 \times 10^{-3}$ |
| R <sup>2</sup>                     | 0.9983                 | 0.9989                 | 0.9998                 | 0.9984                 | 0.9998                 |
| $k_{\text{obs}}$ , (313 K)         | $3.825 \times 10^{-3}$ | $3.566 \times 10^{-3}$ | $4.229 \times 10^{-3}$ | $3.500 \times 10^{-3}$ | $3.064 \times 10^{-3}$ |
| R <sup>2</sup>                     | 0.9996                 | 0.9999                 | 0.9990                 | 0.9991                 | 0.9997                 |

<sup>e</sup> All these kinetics data were obtained at target temperature  $\pm 0.5$  K and repeated 5 times.

**Table S5** Selected geometrical data of structures in the reaction of hydrazine NH-4 and formaldehyde with H<sub>3</sub>O<sup>+</sup>, H<sub>2</sub>O and H<sup>+</sup> at B3-LYP/6-311+G\*\*.

| Transition state                          | distances/Å       |                  |                   |                  | Bond angle/degree   |                                  |                     |                                  |
|-------------------------------------------|-------------------|------------------|-------------------|------------------|---------------------|----------------------------------|---------------------|----------------------------------|
|                                           | N <sup>2</sup> -C | C-O <sup>1</sup> | O <sup>1</sup> -H | H-N <sup>2</sup> | H-N <sup>2</sup> -C | N <sup>2</sup> -C-O <sup>1</sup> | C-O <sup>1</sup> -H | O <sup>2</sup> -H-N <sup>2</sup> |
| Trans. 1 (H <sub>3</sub> O <sup>+</sup> ) | 1.460             | 1.453            | 1.420             | 1.896            | 101.7               | 110.5                            | 108.3               | 135.1                            |
| Trans. 1 (H <sub>2</sub> O)               | 1.547             | 1.381            | 1.170             | 1.078            | 101.4               | 106.8                            | 103.5               | 148.3                            |
| Trans. 1 (H <sup>+</sup> )                | 1.474             | 1.485            | 1.207             | 1.383            | 73.9                | 94.1                             | 78.6                | 113.3                            |
| Trans. 2 (H <sub>3</sub> O <sup>+</sup> ) | 1.291             | 2.307            | 0.987             | -                | -                   | 114.1                            | 112.5               | -                                |
| Trans. 2 (H <sub>2</sub> O)               | 1.319             | 2.009            | 1.112             | 1.151            | 108.6               | 107.8                            | 88.8                | 144.7                            |
| Trans. 2 (H <sup>+</sup> )                | 1.284             | 3.059            | -                 | -                | -                   | 106.7                            | 177.3               | -                                |

**Table S6** Taking the NH-4 with formaldehyde as an example to verify the delta Gibbs free energy  $\Delta G$  (kcal·mol<sup>-1</sup>), DFT TS calculation at B3-LYP/6-311+G\*\*

| Gibbs free energy             |          |       |       |       |         | Eyring function |
|-------------------------------|----------|-------|-------|-------|---------|-----------------|
|                               | Reactant | TS1   | IM    | TS2   | Product |                 |
| H <sub>3</sub> O <sup>+</sup> | 0        | 23.44 | -0.75 | 12.74 | -8.79   |                 |
| H <sub>2</sub> O              | 0        | 9.03  | -9.09 | 25.28 | -24.18  | -7.88           |
| H <sup>+</sup>                | 0        | 40.02 | -5.01 | -5.13 | -8.62   |                 |
